# Supplementary material for: Telomere length is maternally inherited and associated with lipid metabolism in Chinese population
Source: publisher site journal article supplement (doi:10.18632/aging.203810), 2022-01-07
Supplement: Supplementary file [file aging-v14i1-203810-supplementary-material-SD1.pdf]

## SUPPLEMENTARY FIGURE

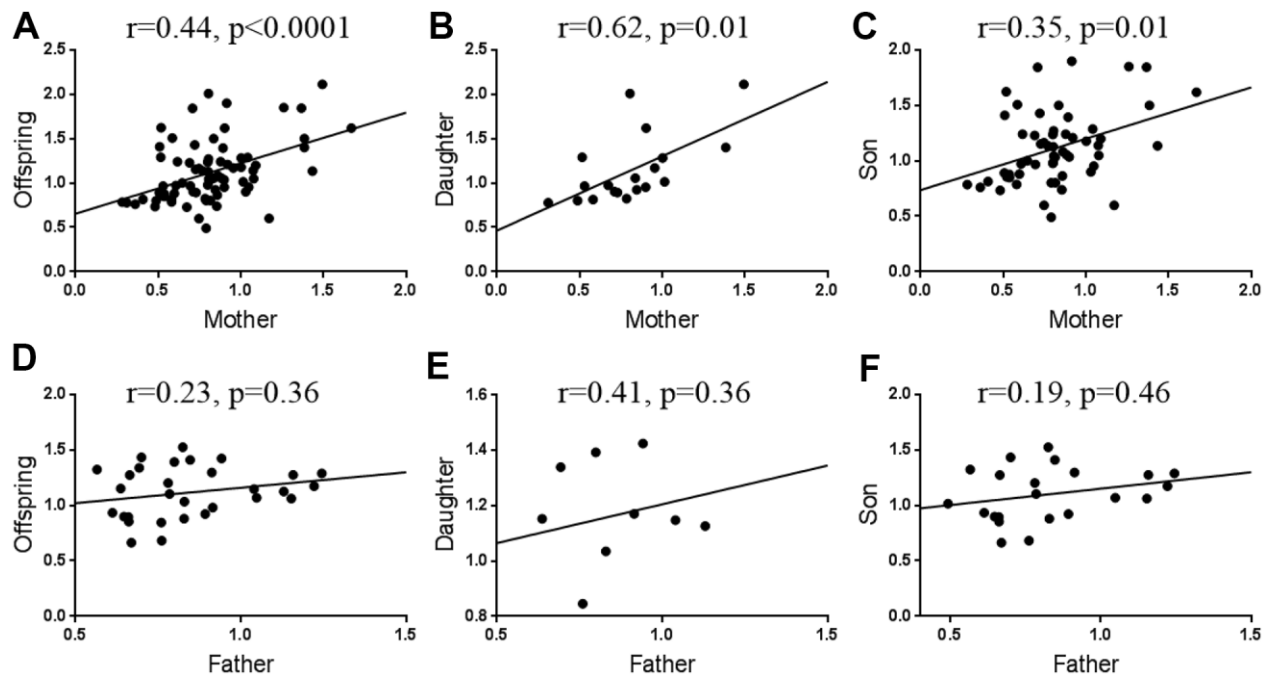

**Supplementary Figure 1. Intrafamilial associations of telomere length.** (A) mother vs. offspring. (B) mother vs. daughter. (C) mother vs. son. (D) father vs. offspring. (E) father vs. daughter. (F) father vs. son.
