# Supplementary material for: Telomere length is maternally inherited and associated with lipid metabolism in Chinese population
Source: Aging (Albany NY). 2022 Jan 7;14(1):354–67. doi: 10.18632/aging.203810 (PMC8791204; doi:10.18632/aging.203810)
Supplement: Supplementary Table 2 [file aging-14-203810-s003.xlsx]

## Sheet: Coexpression analysis
Supplementary Table 2. Expression associations of the telomere length (TL) related genes with lipid metabolism related genes.
Genes related to telomere length	Genes related to lipid metabolism	Correlation coefficient	p value	adjust p value
TERT	ACSL6	0.93334	0	0
TERT	CPT1C	0.919092	0	0
TERT	CPT2	0.924761	0	0
TERT	HMGCLL1	0.954673	0	0
TERT	CYP46A1	0.938693	0	0
TERT	AKR1D1	0.960117	0	0
TERT	UGT2B10	0.946388	0	0
TERT	UGT2B7	0.962612	0	0
TERT	UGT1A8	0.930961	0	0
TERT	UGT1A5	0.907435	0	0
TERT	DGKI	0.886583	0	0
TERT	DGKB	0.882147	0	0
TERT	PNPLA3	0.958841	0	0
TERT	LIPG	0.944976	0	0
TERT	PLA2G2A	0.890002	0	0
TERT	GDPD1	0.92757	0	0
TERT	CERS5	0.92363	0	0
TERT	ACER1	0.889685	0	0
TERT	ACER3	0.915026	0	0
TERT	CYP4F8	0.9827	0	0
TERF1	CYP51A1	0.910963	0	0
TERF1	DGKH	0.902131	0	0
TERF1	AGK	0.895831	0	0
TERF1	NEU3	0.882214	0	0
TERF2	ACSL6	0.921183	0	0
TERF2	ACAA2	0.89746	0	0
TERF2	HSD17B12	0.895936	0	0
TERF2	HACD2	0.914147	0	0
TERF2	CPT1C	0.914408	0	0
TERF2	CPT2	0.910416	0	0
TERF2	ALDH3A2	0.917588	0	0
TERF2	CYP46A1	0.961369	0	0
TERF2	AKR1D1	0.929069	0	0
TERF2	DGKI	0.92143	0	0
TERF2	LIPG	0.965894	0	0
TERF2	PLA2G4C	0.88298	0	0
TERF2	GDPD1	0.943274	0	0
TERF2	CERS5	0.915917	0	0
TERF2	ACER3	0.941613	0	0
TERF2	CYP4F8	0.938592	0	0
TERF2	CYP2C9	0.899813	0	0
TPP1	AGPAT3	0.902575	0	0
SIRT1	SPTLC1	0.901959	0	0
PPARA	ACACB	0.889993	0	0
PPARA	HACD2	0.909681	0	0
PPARA	DGKH	0.930216	0	0
PPARA	LIPG	0.893019	0	0
PPARA	NEU1	0.879382	0	0
TERF1	PLA1A	0.121059	0.000114009	0.00524442
TERF1	AGPAT1	-0.120472	0.000123122	0.00554051
SIRT1	PLA1A	0.121804	0.000103354	0.00826831
PPARA	CHKB	-0.120035	0.000130356	0.00899458
SIRT1	AKR1C4	0.120809	0.000117812	0.00930715
SIRT1	ALOX5	0.120496	0.000122748	0.00957431
SIRT1	HSD3B2	0.119298	0.000143471	0.0110473
PPARA	CRLS1	0.118139	0.000166607	0.0113293
TERF1	AKR1C3	0.114185	0.000274683	0.0120861
SIRT1	ACSF3	0.118449	0.0001601	0.0121676
TERF2	DGKZ	-0.120092	0.000129399	0.0126811
TERF2	GLB1	0.12004	0.000130271	0.0126811
SIRT4	DGKQ	0.12147	0.000108011	0.0127453
SIRT4	SMPD3	0.12145	0.000108288	0.0127453
PPARA	UGT2A2	0.116929	0.000194468	0.0130294
TERF2	PLA2G6	0.119715	0.000135905	0.0130469
SIRT1	PLA2G4D	0.117723	0.000175733	0.01318
PPARA	CYP3A5	0.115337	0.000237843	0.0156977
POT1	ETNK2	0.12166	0.000105332	0.0161158
SIRT1	ACSBG2	0.11579	0.000224641	0.0166234
TPP1	CYP2C9	0.121809	0.000103288	0.0167327
YWHAG	HACD2	0.121961	0.000101225	0.0168033
SIRT1	CBR3	-0.115525	0.000232278	0.0169563
SIRT4	B4GALT6	0.119138	0.000146475	0.0169911
AKT1	MSMO1	0.121368	0.000109473	0.0172967
AKT1	LCAT	-0.121342	0.000109847	0.0172967
TERF2	CYP2J2	0.117365	0.00018396	0.0174762
AKT1	UGT8	0.121143	0.00011276	0.0175906
AKT1	AKR1A1	-0.121047	0.000114191	0.0176996
SIRT1	DGKI	0.115022	0.000247428	0.0178148
POT1	AGPAT1	-0.120649	0.000120315	0.0182878
SIRT4	AMACR	0.118414	0.000160817	0.018494
SIRT1	SRD5A2	0.114596	0.000260966	0.0185286
TERF2IP	PLPP3	0.12124	0.000111331	0.0190376
AKT1	HMGCLL1	-0.120415	0.000124057	0.0191047
SIRT4	HTD2	0.118033	0.000168893	0.0192538
SIRT6	UGT2A1	-0.120659	0.000120148	0.0197042
TERF2IP	OLAH	-0.120904	0.000116358	0.0197809
TERF2	PTGS1	0.116299	0.000210665	0.0198025
AKT1	DGAT2	0.120047	0.000130154	0.0199136
TERT	SGMS2	0.121371	0.000109431	0.0200258
SIRT4	ACSL1	-0.117569	0.000179238	0.0202539
TERT	GDPD3	-0.121229	0.000111492	0.0202915
AKT1	CYP24A1	-0.119816	0.000134136	0.0203886
AKT1	HSD11B1L	-0.119787	0.000134644	0.0203886
AKT1	PLA2G2F	-0.119781	0.000134736	0.0203886
TERF1	HSD11B1	0.109599	0.000481115	0.020688
TERF2IP	ACOT7	0.120347	0.000125162	0.0211524
TERF2IP	CYP4F8	-0.120159	0.000128262	0.021548
SIRT6	ACAA1	0.119836	0.000133784	0.0218068
AKT1	GPX6	-0.119093	0.000147327	0.0219518
TINF2	LCAT	-0.118191	0.000165494	0.0220107
SIRT4	LYPLA2	-0.116804	0.000197591	0.0221302
AKT1	CYP3A7-CYP3A51P	0.118946	0.000150155	0.022223
TERF2IP	ACER2	0.119843	0.000133661	0.0223214
AKT1	DGKB	-0.118821	0.000152592	0.022431
TPP1	CYP3A7-CYP3A51P	0.11941	0.000141403	0.0227658
AKT1	ECHS1	-0.118603	0.000156949	0.0229146
SIRT4	PLA2G4B	0.11642	0.000207455	0.0230275
SIRT1	GPX5	0.112676	0.00033108	0.0231756
POT1	MOGAT1	0.118437	0.000160348	0.0242126
AKT1	CERS1	-0.118117	0.000167071	0.0242253
TINF2	UGT1A9	0.117103	0.000190205	0.0251071
SIRT2	FAR1	0.12132	0.00011016	0.0251164
TERT	PTGES3	-0.119335	0.000142781	0.0258434
SIRT4	UGT2B11	0.115434	0.000234955	0.025845
TINF2	CBR3	-0.116813	0.000197351	0.025853
TERT	PPT1	-0.119241	0.000144536	0.0258874
TERT	AGPAT4	0.119279	0.000143819	0.0258874
SIRT4	GBA	-0.115324	0.000238223	0.0259663
TINF2	CYP3A4	0.116719	0.000199746	0.0259669
TINF2	BAAT	0.116612	0.000202468	0.0261184
POT1	COMT	0.117696	0.000176341	0.0264511
TPP1	CYP3A7	0.118093	0.000167598	0.0268157
SIRT1	CYP39A1	0.111353	0.000389258	0.0268588
TERF2	ADH5	0.113744	0.000290179	0.0269867
POT1	MCAT	0.117481	0.000181251	0.0270064
PPARA	ADPRM	0.110737	0.000419493	0.0272671
TPP1	CYP2C8	0.117866	0.000172542	0.0274341
AKT1	ENPP7	-0.117009	0.000192508	0.0277212
AKT1	UGT1A3	-0.116862	0.00019614	0.028048
SIRT1	PLA2G3	0.110859	0.000413344	0.0281074
TERF2IP	DGKB	-0.117991	0.000169805	0.0281876
TERT	EPHX2	0.118512	0.0001588	0.0282663
SIRT4	ACOT7	0.114535	0.000262961	0.0283998
AKT1	GAL3ST1	-0.116645	0.000201628	0.0286312
SIRT6	EHHADH	-0.117633	0.00017776	0.0287972
SIRT6	HSD11B2	0.117623	0.000177999	0.0287972
SIRT4	HSD17B4	0.114341	0.000269394	0.0288251
SIRT1	DHRS11	0.110412	0.000436286	0.0292311
TERF2IP	CYP2J2	0.117615	0.000178185	0.0294005
SIRT1	PLA2G2E	0.110205	0.000447338	0.0295243
SIRT1	CYP11B2	0.109942	0.000461719	0.0300117
SIRT2	SRD5A1	-0.119883	0.00013297	0.0301842
SIRT1	PLA2G2F	0.109759	0.000471984	0.030207
TINF2	PPT1	0.115272	0.000239778	0.0306916
TPP1	PLA2G4E	0.116926	0.000194553	0.0307394
PPARA	LIPF	0.109523	0.000485539	0.0310745
TERT	SGMS1	0.117684	0.000176612	0.0312603
SIRT4	CBR1	0.11361	0.000295039	0.0312742
SIRT6	UGT2B11	-0.11683	0.000196928	0.0315085
TERT	DGKE	0.117517	0.000180434	0.0317565
FOXO4	ALDH1B1	0.117993	0.000169758	0.0320842
SIRT1	SULT2B1	0.108992	0.000517349	0.032593
TERF2	FASN	0.112077	0.000356342	0.0327835
TERF2	HSD17B1	-0.111879	0.00036508	0.0332223
TINF2	NEU2	0.11456	0.000262162	0.0332946
TERF2	FAR2	0.111737	0.000371473	0.0334326
POT1	GPX3	0.115464	0.000234066	0.0346418
TERF2IP	PLAAT3	-0.116263	0.000211634	0.034708
TERF2IP	DGKI	-0.116157	0.000214468	0.0349583
SIRT1	CYP17A1	0.108158	0.000571331	0.0354225
AKT1	PLA2G5	-0.114702	0.000257527	0.0363112
SIRT6	DHCR24	-0.115645	0.000228807	0.0363803
AKT1	CYP11B2	-0.114561	0.000262129	0.036698
AKT1	PLA2G4D	-0.114108	0.000277352	0.0385519
AKT1	UGT1A4	-0.113942	0.000283133	0.0390724
AKT1	ALDH7A1	-0.113762	0.000289526	0.039665
FOXO4	PLPP3	0.116284	0.000211053	0.039678
POT1	SRD5A3	0.114313	0.000270338	0.0397397
YWHAG	SCP2	0.115193	0.000242163	0.0399569
TPP1	SMPD1	0.114751	0.000255973	0.0399641
TPP1	SCD5	0.114795	0.000254548	0.0399641
TPP1	PLAAT3	0.114564	0.000262006	0.040611
POT1	DEGS2	-0.114078	0.000278392	0.0406452
AKT1	GGT1	-0.113402	0.000302711	0.0411687
PPARA	PEMT	-0.106976	0.000656792	0.0413779
AKT1	PLA2G2C	-0.113014	0.000317594	0.0428752
AKT1	ACHE	-0.112987	0.000318648	0.0428752
TERF1	ACOT1	0.103006	0.00103857	0.0436198
FOXO4	CYP2C8	0.115489	0.000233327	0.0436322
SIRT1	PNLIPRP2	0.106182	0.000720706	0.0439631
TERF2	LPCAT2	0.109301	0.000498631	0.0440488
TERF2	HPGDS	0.109363	0.00049493	0.0440488
TERF2	PEMT	-0.109165	0.00050678	0.0440899
TINF2	UGT1A6	0.112157	0.000352875	0.0444623
SIRT2	CYP2C8	0.11672	0.000199713	0.0451351
YWHAG	LCAT	-0.114033	0.000279925	0.0459077
TERF2IP	HMGCLL1	-0.113865	0.00028583	0.0463044
SIRT6	BDH1	-0.113348	0.000304768	0.0481534
TERF1	CPT1B	0.10174	0.00119805	0.0491199
POT1	PLA2G2C	0.112369	0.000343833	0.0498558
AKT1	CYP2B6	-0.111645	0.000375667	0.0499637
PPARA	ACAT2	0.105109	0.000816304	0.0506108
POT1	HSD11B1	0.112078	0.000356279	0.0513042
TERT	MBOAT7	-0.113509	0.000298762	0.0522834
FOXO4	PNPLA7	0.113915	0.000284091	0.0528409
TERT	GPX1	-0.11335	0.000304681	0.0530145
POT1	HSD17B3	-0.111711	0.000372638	0.0532873
SIRT4	LPIN2	0.109041	0.000514385	0.0540105
SIRT6	LPIN3	-0.112271	0.000347983	0.0546333
AKT1	GPX8	-0.110839	0.000414331	0.0546917
SIRT1	ALOX12	0.103706	0.000958943	0.0575366
FOXO4	ALOX15B	0.113181	0.000311123	0.0575577
TPP1	LCAT	-0.111681	0.000374005	0.0575967
SIRT2	GPAM	0.114672	0.000258488	0.0581597
TERF1	HSD17B8	-0.099808	0.00148537	0.0594147
SIRT2	ENPP2	0.114377	0.000268197	0.0600761
SIRT6	CYP46A1	-0.111439	0.000385194	0.0600903
POT1	AKR1C1	0.110578	0.00042765	0.0607263
TERF2IP	SULT2B1	-0.111503	0.000382218	0.0615371
AKT1	GPX5	-0.109759	0.000471996	0.0618315
TERT	UGCG	0.111972	0.000360968	0.0624475
AKT1	HSD17B8	0.109603	0.00048092	0.0625196
SIRT1	ACHE	0.102828	0.00105975	0.0625251
TERF2IP	UGT1A8	-0.111272	0.000393089	0.0628943
TERF2IP	ETNPPL	-0.111184	0.000397319	0.0631738
SIRT2	HSD3B1	0.113909	0.000284282	0.063395
TERT	PHOSPHO1	-0.111725	0.000371987	0.0639818
SIRT6	AKR1C3	-0.110838	0.00041439	0.0642304
SIRT6	CYP2C8	-0.110768	0.000417924	0.0643604
SIRT4	GLA	-0.107406	0.000624442	0.0649419
AKT1	PLA2G2D	-0.109038	0.000514543	0.066376
TPP1	CEL	-0.110452	0.000434183	0.06643
TINF2	CYP24A1	0.10875	0.000532538	0.0665673
TINF2	CH25H	0.108737	0.000533364	0.0665673
PPARA	HSD3B7	0.10246	0.00110471	0.0673871
SIRT1	PNLIPRP3	0.101967	0.00116783	0.0677343
SIRT1	LCAT	-0.101835	0.00118529	0.0677343
TERT	LTC4S	0.111151	0.000398933	0.0682175
TPP1	PLA1A	0.110029	0.00045693	0.0694534
SIRT4	CYP7B1	0.106605	0.000686013	0.0703994
SIRT4	LTC4S	-0.106636	0.000683489	0.0703994
TINF2	CYP4F8	0.108022	0.000580618	0.0714161
TPP1	PTGIS	0.109706	0.000474976	0.0717213
SIRT2	LTC4S	-0.112851	0.000324016	0.0719317
TERT	SELENOI	0.110553	0.000428908	0.0729143
SIRT2	ENPP6	0.112694	0.000330372	0.0730122
SIRT4	GPD2	0.106099	0.000727694	0.0734971
TERF1	CEL	-0.0974722	0.00191697	0.0747618
TERT	ELOVL7	0.11028	0.000443285	0.0749151
SIRT6	AKR1C2	-0.109349	0.000495768	0.0758525
TERF2IP	ALDH7A1	-0.109616	0.000480168	0.0758666
TERF2	DGAT2	-0.104402	0.000885535	0.076156
SIRT1	ACOX2	0.100491	0.0013772	0.0771234
YWHAG	ECI1	-0.109666	0.00047728	0.0777966
TINF2	HMGCS2	0.107193	0.000640282	0.0781144
TERF1	DGAT2	-0.096779	0.0020656	0.0784928
SIRT2	CHKB	0.112045	0.000357749	0.0787048
TERF2IP	UGT1A5	-0.109186	0.000505552	0.0793716
FOXO4	ACER2	0.110484	0.000432519	0.0795836
TERF2IP	CBR3	-0.109046	0.000514074	0.0801955
SIRT2	DGKI	-0.111815	0.00036795	0.080581
SIRT6	HSD11B1L	0.108773	0.000531065	0.0807218
TERF2IP	UGT1A1	-0.108904	0.000522864	0.0810439
POT1	HSD17B2	0.108069	0.000577373	0.0814095
TERF2	MECR	0.103697	0.000960025	0.0816021
AKT1	ADH1B	-0.107192	0.000640346	0.0819643
FOXO4	CYP3A5	-0.109999	0.000458557	0.0839159
POT1	GPD1	0.107721	0.000601658	0.0842321
TINF2	UGT2B17	0.106399	0.000702701	0.0850268
SIRT2	ELOVL5	0.111302	0.000391702	0.085391
TERT	SMPD1	-0.108735	0.000533468	0.0896226
SIRT4	GBA2	0.104249	0.00090128	0.090128
TERF2	ALDH9A1	0.10253	0.00109607	0.0920695
SIRT4	LPCAT1	0.103931	0.000934649	0.0925302
TPP1	SULT2B1	-0.107495	0.000617924	0.0926886
PPARA	DGKQ	0.099397	0.00155415	0.093249
FOXO4	PLD1	0.108939	0.000520676	0.094763
SIRT4	HSD17B8	0.103505	0.000981227	0.0961603
AKT1	PLA2G2E	-0.105748	0.000758066	0.0962744
AKT1	ADH4	-0.105557	0.000775019	0.0976524
SIRT2	CYP1B1	0.110096	0.000453251	0.0983556
TINF2	ENPP6	0.105032	0.000823579	0.0988295
TERF1	ACOT2	0.0943386	0.00267684	0.0990431
SIRT4	GK2	0.103086	0.00102919	0.0998312
TINF2	UGT2B11	0.104691	0.000856558	0.10193
YWHAG	HSD3B1	0.107247	0.000636194	0.103063
TPP1	GDPD1	0.10652	0.000692853	0.103235
AKT1	ADH1A	-0.104741	0.000851642	0.106455
PPARA	UGT2B11	0.0979877	0.00181285	0.106958
POT1	PISD	0.105589	0.000772146	0.107328
TERT	DGKZ	-0.106989	0.000655764	0.109513
TINF2	DGKZ	-0.103888	0.000939275	0.110835
SIRT2	LPIN2	0.109039	0.000514456	0.111123
SIRT4	SOAT1	0.102037	0.00115862	0.111228
SIRT1	AKR1D1	0.0969224	0.00203402	0.111871
TERT	ECI1	-0.106753	0.000674204	0.111918
TERF2IP	PNPLA7	0.106076	0.000729713	0.112376
FOXO4	ACADSB	0.107187	0.000640721	0.115971
TPP1	HSD3B7	0.1054	0.000789272	0.116812
SIRT6	TKFC	0.105521	0.000778285	0.117521
TERF1	CBR1	-0.0923529	0.0032914	0.11849
SIRT6	CERS5	-0.105386	0.000790535	0.11858
TERT	GPD2	0.10612	0.000725931	0.119779
TERF2IP	PNLIPRP1	-0.105344	0.000794367	0.121538
SIRT6	GPX8	-0.105016	0.000825127	0.122944
TERF2	UGT2A2	0.0997619	0.00149293	0.123913
AKT1	PTGDS	-0.103155	0.00102108	0.126614
TERF1	AKR1B10	0.0914149	0.00362418	0.126846
TPP1	MOGAT3	0.104437	0.000881945	0.128896
TPP1	PLA2G3	-0.104488	0.000876846	0.128896
POT1	PTGES	-0.103908	0.000937124	0.129323
POT1	CYP2E1	0.103748	0.000954399	0.130753
TERT	ALOX5	-0.105236	0.000804383	0.131919
SIRT4	AKR1C3	0.100411	0.00138947	0.131999
SIRT1	THEM5	0.0950413	0.00248579	0.132955
SIRT1	SULT1E1	0.0951318	0.00246212	0.132955
SIRT1	PSAPL1	0.0951194	0.00246535	0.132955
SIRT4	PAFAH1B2	0.100247	0.00141502	0.133012
FOXO4	ELOVL3	-0.105643	0.000767318	0.138117
TINF2	CYP19A1	0.101762	0.00119511	0.139828
POT1	FASN	0.102973	0.00104236	0.141762
SIRT4	HSD11B1	0.0995188	0.00153347	0.142613
SIRT6	BAAT	-0.103637	0.000966594	0.143056
FOXO4	SRD5A3	-0.105253	0.000802838	0.143708
FOXO4	PLA2G15	-0.10499	0.000827539	0.147302
SIRT2	AGPAT1	0.106429	0.000700208	0.150545
TPP1	PTGES	-0.102982	0.00104131	0.15099
PPARA	LCLAT1	0.0945929	0.00260621	0.15116
TERT	AKR1C4	0.10397	0.000930501	0.151672
YWHAG	ACSL6	-0.103857	0.000942597	0.151758
POT1	DGKB	0.10223	0.00113375	0.153056
TPP1	ACAA1	0.102775	0.00106612	0.153521
SIRT2	ALOX15B	0.106084	0.000728999	0.156006
TPP1	ECHS1	-0.102519	0.00109734	0.156919
FOXO4	LCAT	-0.104257	0.000900355	0.159363
POT1	TKFC	0.101694	0.00120419	0.161362
TINF2	HSD17B3	-0.100302	0.00140645	0.163148
TINF2	PTGES	-0.100279	0.00140992	0.163148
TERF2IP	DHRS11	-0.102575	0.00109048	0.165753
AKT1	CYP4F8	-0.100651	0.00135303	0.166423
SIRT4	HADHB	0.0979136	0.00182749	0.168129
SIRT2	LBR	0.105298	0.000798676	0.170118
TERF2IP	DGAT1	0.102238	0.00113272	0.17104
TERF1	ALOX5	-0.088044	0.0050874	0.172972
YWHAG	MECR	0.10263	0.00108377	0.173403
AKT1	NDUFAB1	0.10005	0.00144617	0.176433
SIRT2	ACSF3	0.104771	0.000848753	0.179936
TERT	CBR1	-0.102396	0.00111279	0.180272
FOXO4	PLA2G12B	0.103092	0.00102839	0.180997
SIRT1	PLA2G12B	0.0915748	0.00356538	0.181834
TERF2	AKR1B10	0.0960729	0.0022278	0.18268
TERF2IP	LIPG	-0.10154	0.00122516	0.183774
AKT1	ACSBG2	-0.0995684	0.00152511	0.184539
SIRT1	CYP3A7-CYP3A51P	0.0911942	0.00370677	0.185339
TERF1	UGT2A2	0.0869294	0.00567754	0.187359
YWHAG	PTGES	-0.101784	0.00119209	0.189541
TERF2IP	CYP46A1	-0.10113	0.00128269	0.190469
TERF2IP	PLA2G2A	-0.10116	0.00127831	0.190469
SIRT4	PLA2G12A	0.0966254	0.00209995	0.191095
SIRT2	CH25H	0.104149	0.000911612	0.19235
TERT	LPGAT1	0.101739	0.00119808	0.19289
TERF2	PTGDS	-0.0953639	0.00240232	0.194588
TINF2	MOGAT1	0.0984697	0.00172022	0.196105
TERF2	LIPA	0.0951531	0.00245658	0.196526
TERT	LTA4H	-0.101491	0.00123191	0.197106
TERF2IP	CYP8B1	-0.100688	0.00134745	0.198075
TINF2	UGT1A1	0.0982892	0.0017544	0.198247
TERF2	ASAH2	0.0949297	0.00251528	0.198707
TERF2	ALOX5	-0.0947531	0.00256259	0.199882
PPARA	THEM5	-0.0916747	0.00352908	0.201158
AKT1	HSD11B1	0.0986403	0.0016885	0.20262
AKT1	UGT1A10	-0.0985477	0.00170566	0.202973
SIRT4	ACADS	0.0959272	0.00226269	0.203642
POT1	ENPP6	0.0993473	0.00156266	0.207834
SIRT4	AKR1B10	0.0955895	0.00234548	0.208748
TERF2	GK	0.0940229	0.00276698	0.213057
YWHAG	NSDHL	-0.100659	0.00135182	0.213588
SIRT6	LPCAT3	-0.0999113	0.00146852	0.215872
PPARA	PTGES2	-0.0907623	0.0038734	0.21691
PPARA	GPX7	0.0905856	0.00394351	0.21691
TINF2	CYP21A2	0.0973532	0.00194175	0.217476
TINF2	ACAA1	-0.0971894	0.00197636	0.219377
TERT	LYPLA2	-0.100399	0.00139136	0.221226
SIRT6	HMGCS2	-0.0995956	0.00152055	0.222001
TERT	LIPF	0.100157	0.0014291	0.225798
TERT	MECR	0.100084	0.00144068	0.226186
POT1	UGT1A10	0.0984554	0.00172291	0.227424
POT1	CYP27B1	0.0983558	0.00174172	0.228165
POT1	UGT2B11	0.0982992	0.00175248	0.228165
TPP1	THEM5	0.0990427	0.00161578	0.229441
SIRT2	OLAH	-0.102415	0.00111038	0.23318
SIRT6	HMGCL	-0.0989917	0.00162483	0.2356
TERF2	UGT2B15	0.0929057	0.00310857	0.236251
PPARA	PPT1	-0.0894691	0.00441375	0.238342
POT1	GPAT2	0.0977529	0.00185961	0.23989
TERF2IP	UGT2B7	-0.098882	0.00164447	0.240092
TERT	DGKD	0.0993744	0.001558	0.243049
TPP1	CYP2J2	0.0984297	0.00172773	0.243611
SIRT6	PLA2G1B	0.0985567	0.00170397	0.245372
TERT	CYP2J2	0.099182	0.00159127	0.246647
SIRT2	UGT2B10	-0.10175	0.0011966	0.250089
AKT1	CYP46A1	-0.0965339	0.00212064	0.250236
POT1	CYP11A1	0.09723	0.00196774	0.251871
TERF2IP	UGT2B10	-0.0983794	0.00173725	0.251901
TERF2IP	PLA2G2C	-0.098187	0.00177401	0.255458
POT1	UGT2B17	0.0970156	0.00201373	0.255743
SIRT6	GPX3	0.0980223	0.00180605	0.258265
TERT	CYP1B1	0.0986326	0.00168992	0.260248
AKT1	PNPLA2	-0.095918	0.00226492	0.264995
POT1	PCYT2	0.0965924	0.00210738	0.26553
AKT1	HMGCS2	-0.0957196	0.00231327	0.268339
SIRT2	LYPLA1	0.10097	0.00130581	0.271609
AKT1	CYP7A1	-0.0955144	0.00236426	0.27189
TERF2IP	HACD1	0.0975401	0.00190295	0.272122
YWHAG	DGKZ	-0.0983403	0.00174465	0.27391
TERF2IP	ACOX2	-0.0973612	0.00194007	0.27549
TERT	GCDH	0.0979764	0.00181508	0.277707
POT1	CBR3	-0.0960746	0.0022274	0.278425
SIRT6	PLAAT3	-0.0972456	0.00196443	0.278949
SIRT2	CYP27A1	0.100479	0.00137903	0.285459
SIRT2	AKR1D1	-0.100446	0.00138413	0.285459
TINF2	ADH7	0.0944992	0.00263203	0.289523
TERF2	TBXAS1	0.0907765	0.00386781	0.290086
TERF1	CYP3A5	0.0819082	0.00917324	0.293544
TPP1	CDS1	0.0966306	0.00209877	0.293827
POT1	CH25H	0.095465	0.0023767	0.294711
PPARA	ECI1	-0.0871006	0.0055831	0.295905
TPP1	ETNPPL	-0.0964156	0.00214769	0.298529
TERF2IP	CYP11B1	-0.0965456	0.00211797	0.298634
TERF2IP	PSAPL1	-0.0965136	0.00212525	0.298634
TERT	CHKB	-0.0971698	0.00198055	0.301044
POT1	CYP19A1	0.0950829	0.00247488	0.304411
TERF2	CYP3A5	0.0901228	0.00413261	0.305813
TERT	CYP3A5	0.0969573	0.00202638	0.305984
AKT1	GPD1	-0.0942944	0.0026893	0.306581
SIRT4	CPT1A	0.0917452	0.00350367	0.308323
SIRT1	SCP2	0.085809	0.00633222	0.310279
AKT1	PNLIPRP3	-0.0940551	0.00275766	0.311616
TERT	ACOT2	-0.0966805	0.00208756	0.312047
TERT	HSD17B1	-0.0967129	0.00208032	0.312047
AKT1	PLA2G12B	0.0938434	0.00281944	0.315777
TINF2	UGT1A7	0.0932914	0.00298653	0.325532
TPP1	LIPG	0.0954814	0.00237256	0.327414
FOXO4	ACER1	-0.0975606	0.00189872	0.332275
TINF2	AKR1B1	0.0929557	0.00309249	0.333989
POT1	HSD3B1	0.093914	0.0027987	0.341441
TERT	THEM4	0.0957124	0.00231504	0.342625
SIRT4	CYP3A5	0.0903578	0.00403557	0.351095
TERF1	LCLAT1	0.079617	0.0113281	0.351172
YWHAG	PLA2G3	-0.0959477	0.00225776	0.35221
YWHAG	PLA2G12B	0.0959313	0.0022617	0.35221
AKT1	CYP19A1	-0.0926544	0.0031905	0.354146
YWHAG	ECHS1	-0.0957471	0.0023065	0.355202
SIRT2	CYP4F8	-0.0983049	0.00175139	0.359035
AKT1	UGT2B7	-0.092409	0.00327241	0.359966
TINF2	ALOX12	-0.0921075	0.00337567	0.361197
TERF2	GNPAT	0.08823	0.0049945	0.364598
POT1	CPT1A	0.0931886	0.00301863	0.365254
YWHAG	ACER3	0.0954002	0.00239309	0.366142
TERF2	PTGES2	-0.0880057	0.00510672	0.367684
TERF2IP	PLA2G4C	-0.0944261	0.00265235	0.368676
SIRT1	UGT1A8	0.0837048	0.00774752	0.371881
SIRT1	PCYT2	-0.0834897	0.00790711	0.371881
AKT1	SRD5A3	-0.0919913	0.00341625	0.372372
AKT1	PNLIPRP2	-0.0919468	0.00343191	0.372372
AKT1	PLA2G1B	-0.0919893	0.00341694	0.372372
SIRT4	LIPA	0.0896511	0.00433377	0.372705
SIRT4	HADHA	0.0894752	0.00441103	0.374938
SIRT4	PPT2	0.0892849	0.00449602	0.376415
SIRT4	PCYT1A	0.089204	0.00453257	0.376415
SIRT4	ACER2	0.089318	0.00448113	0.376415
FOXO4	ACAA2	0.0963046	0.00217333	0.378159
SIRT1	UGT1A4	0.083071	0.00822614	0.378402
SIRT2	ETNK2	0.0977368	0.00186285	0.380022
FOXO4	CYP27A1	-0.0961494	0.00220968	0.382274
AKT1	PLA2G4C	-0.0914319	0.00361789	0.383497
SIRT1	UGT1A5	0.082642	0.00856486	0.385419
TERF2IP	GAL3ST1	-0.093911	0.00279956	0.386339
TINF2	CPT1C	0.0911087	0.00373923	0.392769
TINF2	GGT1	-0.0911979	0.00370537	0.392769
PPARA	CBR3	0.0839179	0.00759234	0.394802
YWHAG	GDPD1	0.094621	0.00259851	0.394973
AKT1	CYP39A1	-0.0909475	0.00380112	0.399118
AKT1	ADH7	-0.0907096	0.00389421	0.404998
SIRT2	UGT2B7	-0.0970734	0.00200124	0.406252
TERF2IP	HSD11B1L	-0.0931099	0.00304339	0.416945
TERF2	LCLAT1	0.0865457	0.00589458	0.418515
POT1	DHCR7	0.0917592	0.00349862	0.419835
SIRT6	PISD	-0.0931603	0.0030275	0.426877
SIRT6	ACOT2	0.0928001	0.00314277	0.439989
SIRT4	PLA1A	0.0873559	0.00544483	0.441031
POT1	HSD3B2	0.0911825	0.00371122	0.441635
POT1	CYP8B1	0.0910953	0.00374434	0.441832
AKT1	LCLAT1	-0.0897305	0.00429929	0.442827
SIRT2	ACER3	-0.0961853	0.00220124	0.44465
POT1	ADH4	0.0909383	0.0038047	0.44515
TERT	SPTLC2	0.0931263	0.00303821	0.446617
PPARA	CHKA	-0.0823929	0.00876721	0.447128
SIRT6	CYP17A1	0.0925428	0.00322751	0.448624
SIRT6	GGT5	0.0924493	0.00325884	0.44972
TINF2	CYP27B1	0.0895733	0.00436778	0.45425
TPP1	CERS5	0.0921682	0.00335463	0.459585
SIRT1	ADH1C	0.0803332	0.0106108	0.459691
SIRT1	HSD11B1L	0.0805021	0.0104475	0.459691
TINF2	CYP2J2	0.0892954	0.00449129	0.462603
SIRT2	CYP7B1	0.0957048	0.0023169	0.465696
FOXO4	UGT2B15	0.0940841	0.00274928	0.472876
SIRT2	LIPG	-0.0954908	0.00237019	0.474038
FOXO4	GGT1	-0.0940042	0.00277241	0.474082
TERF2IP	ACSF3	-0.0916964	0.00352125	0.47889
TPP1	PLA2G12B	0.0916747	0.00352909	0.479956
TINF2	CYP2E1	0.0887781	0.00472959	0.482418
TERF2IP	ELOVL3	-0.0915347	0.00358002	0.483303
TERF2IP	ELOVL7	0.0912723	0.00367736	0.492767
TPP1	SOAT2	-0.0913414	0.0036515	0.492953
SIRT6	DGAT2	0.0913255	0.00365745	0.501071
TINF2	TECR	-0.08829	0.00496486	0.501451
SIRT4	ELOVL6	0.0857639	0.00635994	0.508795
TERT	SOAT1	0.0917916	0.00348704	0.509109
TERT	CHKA	-0.0916352	0.00354337	0.513789
POT1	ADH7	0.0893194	0.00448048	0.519736
SIRT4	SPTLC2	0.085175	0.00673197	0.531826
PPARA	PPT2	0.080136	0.0108041	0.540206
TERT	LPL	0.090981	0.0037882	0.545501
YWHAG	UGT2B17	0.0913287	0.00365622	0.552089
PPARA	ALOX5	-0.0796313	0.0113134	0.554356
TERF2	ELOVL5	0.083453	0.00793459	0.555421
POT1	PLA1A	0.0883985	0.00491169	0.564844
TPP1	CYP11B1	-0.0899236	0.00421651	0.565012
TPP1	HSD11B2	-0.0898526	0.00424679	0.565012
SIRT6	GPX2	0.090042	0.00416644	0.566636
SIRT1	UGT1A3	0.0776262	0.0135531	0.569232
SIRT6	ALOX5	0.0898669	0.00424069	0.572493
AKT1	CYP27B1	-0.0870404	0.00561611	0.572675
AKT1	CYP2C19	-0.0870435	0.00561446	0.572675
YWHAG	SULT2B1	-0.0908076	0.00385563	0.578345
TINF2	PLA2G5	0.0866994	0.00580675	0.580675
POT1	AKR1A1	-0.0879655	0.00512711	0.58449
TERF2	PGS1	0.0827027	0.00851616	0.587615
TERT	AGPAT2	-0.0901029	0.00414094	0.592154
SIRT2	HMGCLL1	-0.0932404	0.0030024	0.597477
SIRT2	CYP46A1	-0.0932318	0.00300509	0.597477
AKT1	HSD11B2	-0.0863521	0.00600685	0.600685
TERF2IP	MGLL	-0.0890821	0.00458822	0.610234
TERF2IP	LCLAT1	-0.0889216	0.00466236	0.615432
TERT	PLD2	0.0896132	0.00435031	0.617744
TERF2	HSD17B8	-0.0819579	0.00913084	0.620897
SIRT2	TECR	0.0927629	0.00315489	0.621513
TPP1	CERS1	-0.0887807	0.00472838	0.624147
TPP1	PSAPL1	-0.0887549	0.00474057	0.624147
TERT	AGPS	0.0893842	0.00445149	0.627661
TPP1	PLA2G2A	-0.0885273	0.00484921	0.630398
TERF2IP	CYP1A2	-0.0885649	0.00483112	0.632876
TERF2IP	SCP2	0.0884591	0.00488218	0.634683
TERF1	ACSF3	0.0724913	0.0211591	0.634774
POT1	UGT1A7	0.0869861	0.00564612	0.638011
POT1	ENPP7	0.0869201	0.00568271	0.638011
TPP1	UGT1A5	-0.0882896	0.00496507	0.640493
TERF1	UGT2B28	0.0719165	0.0222071	0.644007
SIRT4	CDS2	0.0830218	0.00826438	0.644621
YWHAG	GGT1	-0.0895673	0.00437043	0.651193
POT1	ELOVL2	0.0865782	0.0058759	0.652225
TINF2	CPT1B	0.0853806	0.00659994	0.653394
TINF2	UGT1A10	0.0853335	0.00662998	0.653394
SIRT1	ACSL6	0.0756973	0.0160681	0.658793
TERF1	LIPF	0.0711516	0.0236715	0.662801
SIRT4	PNLIP	0.0825779	0.00861653	0.663473
TINF2	MOGAT2	0.0849935	0.00685057	0.664505
TERF2	CERS4	-0.0809987	0.00998058	0.668699
TERF2IP	TM7SF2	-0.0878192	0.00520177	0.671028
FOXO4	ACSL6	-0.0905456	0.00395955	0.673123
TERF2IP	SRD5A2	-0.0876773	0.00527518	0.675222
TPP1	HMGCLL1	-0.0875133	0.00536112	0.686223
POT1	UGT1A6	0.0858965	0.00627875	0.690662
YWHAG	ACER1	-0.0888199	0.0047099	0.697066
SIRT2	LPGAT1	0.0915948	0.00355809	0.697386
TERF2	PPT1	-0.080304	0.0106392	0.702189
TPP1	ACOT8	-0.0871151	0.00557517	0.708047
FOXO4	ACAT1	0.0899162	0.00421966	0.713123
PPARA	DEGS2	0.076457	0.0150324	0.721555
SIRT1	PLA2G2A	0.0742821	0.0181652	0.726609
TERT	UGT2B17	0.087806	0.00520859	0.729203
SIRT6	GGT1	-0.0873552	0.00544518	0.729654
SIRT1	GGT1	-0.0738929	0.0187825	0.732516
SIRT2	SCP2	-0.0910549	0.00375981	0.733163
SIRT6	ALDH2	-0.0872263	0.0055146	0.733441
SIRT4	PEMT	-0.0813533	0.00965857	0.734052
TPP1	ADH1A	-0.0866017	0.00586242	0.734074
TPP1	GAL3ST1	-0.0866656	0.00582598	0.734074
TPP1	PTGES2	-0.086522	0.0059082	0.734074
SIRT4	PLA2G4A	0.0811679	0.00982578	0.736933
YWHAG	AKR1A1	0.088089	0.00506478	0.744523
TINF2	DHRS11	0.0836734	0.00777065	0.745982
SIRT2	BDH2	0.090815	0.00385271	0.747426
SIRT6	OLAH	-0.0869435	0.0056697	0.7484
SIRT6	PTDSS2	-0.0868643	0.00571388	0.748519
TINF2	PLB1	0.083515	0.00788817	0.749376
SIRT6	SLC27A5	-0.0864469	0.00595161	0.772235
SIRT6	PNLIPRP2	0.0864665	0.00594027	0.772235
POT1	PLA2G5	0.0845084	0.00717663	0.782253
SIRT6	MOGAT3	-0.0861372	0.00613376	0.785122
TERT	TMEM86B	-0.0869342	0.00567491	0.785412
TERT	SGPL1	0.0869783	0.00565045	0.785412
AKT1	UGT2B10	-0.0834142	0.00796377	0.788414
YWHAG	LIPF	-0.0874174	0.005412	0.790153
TERT	FDFT1	0.0867662	0.00576897	0.790349
AKT1	PLA2G4E	-0.0832784	0.00806669	0.790536
TERF2IP	PPT2	0.0857911	0.00634317	0.805583
SIRT6	GLA	0.0857166	0.00638912	0.811419
TERT	LCLAT1	0.0862984	0.0060383	0.821209
YWHAG	AKR1D1	-0.086914	0.00568614	0.82449
YWHAG	ETNPPL	-0.0868917	0.00569853	0.82449
SIRT1	HSD11B2	0.0721183	0.0218342	0.829701
SIRT6	CYP39A1	0.0853479	0.00662081	0.834222
SIRT1	HSD17B8	-0.0715545	0.02289	0.846929
SIRT4	SGMS1	0.0794308	0.0115216	0.852596
SIRT4	PLD4	-0.0791148	0.0118566	0.865531
PPARA	AKR1A1	0.0740527	0.0185269	0.870764
TPP1	DGKI	-0.0846173	0.00710224	0.873576
SIRT4	ELOVL7	0.0788434	0.0121511	0.87488
TINF2	ADH4	0.081513	0.00951665	0.894565
AKT1	CYP2C8	0.0818344	0.00923649	0.89594
PPARA	DGKZ	-0.0734344	0.0195329	0.898512
POT1	CYP39A1	0.0827589	0.00847133	0.914904
TINF2	CHAT	0.0811365	0.00985435	0.916455
TERF2	CHKA	-0.0770622	0.0142499	0.926246
TERF1	GPX2	0.0662521	0.0351806	0.949875
FOXO4	CPT2	0.0869695	0.00565529	0.950089
SIRT2	PISD	0.0883723	0.0049245	0.950428
FOXO4	DHRS11	-0.0868348	0.00573036	0.95697
PPARA	AMACR	0.0722923	0.021517	0.968266
FOXO4	HSD3B1	0.0866454	0.00583747	0.969021
TERT	DGKA	0.084406	0.00724722	0.978375
TERF2	ACAT2	0.076217	0.015353	0.982593
SIRT6	DHRS11	0.0835291	0.00787768	0.98471
SIRT4	ALDH2	0.0773532	0.0138866	0.985949
SIRT4	CYP27A1	-0.0771783	0.0141039	0.987275
TERF1	PLA2G12B	0.0652524	0.0380398	0.989036
TPP1	LIPF	-0.0832007	0.00812608	0.991382
TERT	ACSL3	0.0714247	0.0231393	1
TERT	THEM5	-0.0630094	0.0451802	1
TERT	ACADS	-0.0828401	0.00840694	1
TERT	ECI2	0.0695922	0.0269173	1
TERT	HMGCS2	0.068792	0.0287272	1
TERT	CYP7B1	0.0812451	0.00975586	1
TERT	CYP27A1	-0.0778338	0.0133043	1
TERT	ACOT8	-0.0828053	0.00843448	1
TERT	AKR1C3	-0.0662896	0.0350769	1
TERT	UGT2A1	0.0765346	0.0149301	1
TERT	UGT2B11	0.0716887	0.0226347	1
TERT	UGT2A2	0.0745895	0.0176904	1
TERT	GPAM	0.0735133	0.0194019	1
TERT	GPAT4	-0.0620047	0.048727	1
TERT	GPAT3	0.0687239	0.0288857	1
TERT	AGPAT1	-0.0692646	0.027646	1
TERT	AGPAT3	0.0716343	0.022738	1
TERT	MBOAT2	0.0649996	0.0387935	1
TERT	DGKK	0.0742157	0.0182693	1
TERT	DGAT2	-0.0630395	0.0450773	1
TERT	GLA	-0.0664878	0.0345335	1
TERT	PLA2G4A	0.0685258	0.0293519	1
TERT	LPCAT4	-0.0750425	0.0170104	1
TERT	PCYT1A	0.0626471	0.0464331	1
TERT	PAFAH1B3	-0.0837434	0.00771919	1
TERT	PLA2G7	-0.0668741	0.0334955	1
TERT	CERS6	0.0746304	0.0176281	1
TERT	DEGS1	0.0795794	0.011367	1
TERT	DEGS2	0.0792156	0.0117487	1
TERT	GBA2	-0.0645424	0.0401887	1
TERT	B4GALT6	0.0726689	0.0208443	1
TERT	PTGDS	-0.0661908	0.0353504	1
TERT	HPGDS	0.0699928	0.0260489	1
TERT	ALOX12	-0.0674567	0.0319801	1
TERF2	HADHB	0.0674412	0.0320197	1
TERF2	BDH2	0.0661257	0.0355316	1
TERF2	GPAT4	0.0728902	0.0204574	1
TERF2	AGPAT1	-0.0751133	0.0169063	1
TERF2	LIPF	0.0675212	0.031816	1
TERF2	PTDSS2	0.0652414	0.0380724	1
TERF2	ASAH1	0.0653052	0.037884	1
TERF2	GBA2	0.0748743	0.0172602	1
TERF2	CBR1	-0.072017	0.0220207	1
TERF2IP	HSD17B8	0.063507	0.0435056	1
TERF2IP	MECR	0.065411	0.0375736	1
TERF2IP	ACSBG2	-0.0618507	0.0492908	1
TERF2IP	ACADL	-0.0740744	0.0184923	1
TERF2IP	ADH1B	-0.0793257	0.0116321	1
TERF2IP	BDH1	-0.0737364	0.0190356	1
TERF2IP	CYP24A1	-0.07029	0.0254203	1
TERF2IP	HSD3B1	0.0626854	0.0462994	1
TERF2IP	SRD5A1	0.0641147	0.0415319	1
TERF2IP	CYP11B2	-0.0752399	0.0167214	1
TERF2IP	AKR1C1	0.0617476	0.0496711	1
TERF2IP	HSD17B2	-0.0805132	0.0104369	1
TERF2IP	CYP1A1	-0.080174	0.0107667	1
TERF2IP	UGT2B17	0.0639686	0.0419994	1
TERF2IP	UGT1A6	-0.0724859	0.0211688	1
TERF2IP	UGT1A4	-0.0712007	0.023575	1
TERF2IP	UGT1A3	-0.065241	0.0380735	1
TERF2IP	UGT1A9	-0.0698293	0.0264003	1
TERF2IP	UGT1A7	-0.0671821	0.0326868	1
TERF2IP	COMT	0.0655993	0.037026	1
TERF2IP	AGPAT1	0.0684126	0.0296211	1
TERF2IP	PNPLA3	-0.0648845	0.0391409	1
TERF2IP	MOGAT2	-0.0695597	0.0269888	1
TERF2IP	PLA2G2D	-0.069901	0.0262456	1
TERF2IP	PLA2G2E	-0.0627016	0.046243	1
TERF2IP	PLA2G2F	-0.0687869	0.0287389	1
TERF2IP	PLA2G5	-0.0676914	0.0313865	1
TERF2IP	PLA2G4E	-0.0732126	0.0199052	1
TERF2IP	PLA2G4D	-0.0702259	0.0255547	1
TERF2IP	CHAT	-0.0711507	0.0236732	1
TERF2IP	ACHE	-0.0678141	0.03108	1
TERF2IP	UGT8	0.0819755	0.0091159	1
TERF2IP	CERS1	-0.0728032	0.0206088	1
TERF2IP	ENPP7	-0.0816784	0.00937152	1
TERF2IP	GBA	0.0741844	0.0183185	1
TERF2IP	NEU1	-0.0676497	0.0314914	1
TERF2IP	NEU2	-0.0715783	0.0228446	1
TERF2IP	PTGIS	-0.0788848	0.0121058	1
TERF2IP	GPX6	-0.0690704	0.028086	1
TERF2IP	GPX5	-0.0667361	0.0338631	1
TERF2IP	GPX8	-0.0738535	0.018846	1
TPP1	ACSL6	-0.0736435	0.0191875	1
TPP1	ACSBG2	-0.071863	0.0223069	1
TPP1	EHHADH	0.0744662	0.0178796	1
TPP1	ACADVL	-0.0788098	0.012188	1
TPP1	CPT1A	0.0767037	0.014709	1
TPP1	CPT1C	-0.0723347	0.0214404	1
TPP1	CYP24A1	-0.0728835	0.0204691	1
TPP1	CYP8B1	-0.0634654	0.0436436	1
TPP1	AKR1D1	-0.0811629	0.00983032	1
TPP1	ACOX2	-0.0790663	0.0119087	1
TPP1	SCP2	0.0659792	0.0359424	1
TPP1	SRD5A2	-0.0743395	0.0180758	1
TPP1	AKR1C2	0.0743345	0.0180835	1
TPP1	CYP11B2	-0.0698826	0.0262853	1
TPP1	HSD11B1	0.0789374	0.0120484	1
TPP1	HSD11B1L	-0.0771152	0.0141832	1
TPP1	SULT1E1	-0.0617339	0.0497218	1
TPP1	DHRS11	-0.0678386	0.0310191	1
TPP1	UGT1A6	-0.0769096	0.0144437	1
TPP1	UGT1A4	-0.0786434	0.0123723	1
TPP1	UGT1A1	-0.0815565	0.00947827	1
TPP1	UGT1A3	-0.0769335	0.0144133	1
TPP1	UGT2B10	-0.076496	0.0149809	1
TPP1	UGT1A9	-0.0746678	0.0175712	1
TPP1	UGT2B7	-0.0729376	0.0203754	1
TPP1	UGT1A8	-0.0829956	0.00828476	1
TPP1	UGT1A7	-0.0734907	0.0194394	1
TPP1	DGKZ	0.0617489	0.0496664	1
TPP1	MOGAT2	-0.075594	0.0162136	1
TPP1	PLA2G2F	-0.0718823	0.022271	1
TPP1	PLA2G1B	-0.0672683	0.0324635	1
TPP1	CHAT	-0.0703307	0.0253351	1
TPP1	ACHE	-0.0657408	0.0366192	1
TPP1	PCYT2	0.0634926	0.0435535	1
TPP1	CERS3	0.0675767	0.0316754	1
TPP1	NEU2	-0.0808898	0.0100813	1
TPP1	GGT1	-0.0791229	0.0118479	1
TPP1	GPX6	-0.0794706	0.01148	1
TPP1	GPX5	-0.0639401	0.0420909	1
TPP1	CYP2C19	0.0660491	0.0357459	1
TPP1	ALOX15B	0.0645008	0.0403175	1
TINF2	HSD17B8	0.0769645	0.0143737	1
TINF2	PPT2	0.066466	0.034593	1
TINF2	ELOVL6	0.078719	0.0122882	1
TINF2	ACOT1	0.0795876	0.0113585	1
TINF2	CPT1A	0.0628784	0.0456298	1
TINF2	ADH1A	0.0773401	0.0139027	1
TINF2	BDH1	-0.0711102	0.023753	1
TINF2	CYP39A1	0.0619429	0.0489525	1
TINF2	HSD3B1	0.0709206	0.0241297	1
TINF2	HSD3B2	0.0774201	0.0138042	1
TINF2	CYP3A7	0.0762264	0.0153404	1
TINF2	PNLIPRP1	0.0796196	0.0113255	1
TINF2	PNLIPRP3	0.0642176	0.0412053	1
TINF2	MGLL	0.0630119	0.0451716	1
TINF2	PLA2G2D	0.0697802	0.0265066	1
TINF2	PLA2G2F	0.066019	0.0358302	1
TINF2	PLA2G12B	0.0639354	0.0421063	1
TINF2	PLA2G4D	0.0704541	0.0250789	1
TINF2	LPCAT4	-0.0750528	0.0169952	1
TINF2	PCYT2	0.063532	0.0434229	1
TINF2	PISD	0.0691616	0.0278785	1
TINF2	CERS1	0.0696645	0.0267587	1
TINF2	DEGS2	-0.0711763	0.0236228	1
TINF2	ENPP7	0.0792546	0.0117073	1
TINF2	GBA	-0.0642017	0.0412556	1
TINF2	GGT5	0.0640891	0.0416136	1
POT1	ACOT1	0.0643111	0.0409105	1
POT1	CPT1B	0.0789977	0.0119828	1
POT1	ADH6	0.0739952	0.0186185	1
POT1	OXCT2	0.0760353	0.0155998	1
POT1	CYP46A1	0.0773582	0.0138804	1
POT1	CYP7A1	0.0772227	0.0140485	1
POT1	CYP17A1	0.0716531	0.0227023	1
POT1	SRD5A2	0.0683913	0.0296721	1
POT1	AKR1C3	0.0778051	0.0133385	1
POT1	CYP11B2	0.0699342	0.0261743	1
POT1	DHRS11	0.0692781	0.0276155	1
POT1	CYP3A4	0.0807604	0.0102023	1
POT1	UGT2A1	0.0687901	0.0287314	1
POT1	UGT1A4	0.0659913	0.0359083	1
POT1	UGT1A1	0.0653134	0.0378599	1
POT1	UGT1A3	0.0670171	0.0331179	1
POT1	UGT1A9	0.0776197	0.0135611	1
POT1	AKR1B1	0.0674706	0.0319448	1
POT1	PNLIPRP1	0.0733824	0.0196196	1
POT1	PNLIPRP2	0.0800433	0.0108961	1
POT1	PNLIPRP3	0.0778366	0.0133011	1
POT1	MOGAT2	0.0811506	0.00984152	1
POT1	GLA	0.0679311	0.0307901	1
POT1	LCAT	-0.0718283	0.0223719	1
POT1	PLA2G2E	0.0770779	0.0142302	1
POT1	PLA2G2F	0.0770473	0.0142687	1
POT1	PLA2G4D	0.0762503	0.0153083	1
POT1	CHAT	0.0815309	0.00950079	1
POT1	ACHE	0.0758493	0.0158559	1
POT1	CERS1	0.0636599	0.0430017	1
POT1	ACER1	0.0729878	0.0202889	1
POT1	SPHK2	0.0808838	0.0100869	1
POT1	GPX5	0.0746678	0.0175712	1
POT1	GPX8	0.065394	0.0376231	1
SIRT1	ALDH7A1	0.0651556	0.0383269	1
SIRT1	HMGCLL1	0.0648033	0.0393873	1
SIRT1	TM7SF2	0.067879	0.0309188	1
SIRT1	UGT2A2	0.0618085	0.0494463	1
SIRT1	AGPAT1	-0.0667575	0.033806	1
SIRT1	GAL3ST1	0.0665947	0.0342436	1
SIRT1	GBA	-0.0640165	0.0418455	1
SIRT2	ACACB	0.0717757	0.0224707	1
SIRT2	NDUFAB1	0.0871003	0.00558322	1
SIRT2	PPT1	0.0854996	0.00652458	1
SIRT2	ELOVL2	0.0838281	0.00765738	1
SIRT2	ELOVL3	0.0659234	0.0360998	1
SIRT2	ACAT1	0.081758	0.00930245	1
SIRT2	ACOX1	-0.0815605	0.00947475	1
SIRT2	CPT1C	-0.0737666	0.0189866	1
SIRT2	ADH1C	0.0667009	0.0339577	1
SIRT2	ADH7	0.0695878	0.0269269	1
SIRT2	ADH6	0.0815641	0.00947158	1
SIRT2	ALDH1B1	0.0689146	0.0284431	1
SIRT2	SOAT1	0.0859589	0.00624087	1
SIRT2	CYP39A1	0.0747455	0.0174537	1
SIRT2	AMACR	0.0624359	0.0471772	1
SIRT2	CYP17A1	0.0725621	0.0210332	1
SIRT2	CYP21A2	-0.0622749	0.0477507	1
SIRT2	HSD3B2	0.0823994	0.00876186	1
SIRT2	HSD11B1L	0.0778052	0.0133385	1
SIRT2	DHRS11	0.0684089	0.02963	1
SIRT2	UGT1A8	-0.0709766	0.0240179	1
SIRT2	HSD17B3	-0.0640759	0.0416556	1
SIRT2	PLPP3	0.0843808	0.00726468	1
SIRT2	LPIN3	0.0783884	0.0126595	1
SIRT2	PLPP4	0.0671454	0.0327824	1
SIRT2	DGKB	-0.0634179	0.0438015	1
SIRT2	DGAT2	-0.0790478	0.0119287	1
SIRT2	MOGAT3	0.0621895	0.0480577	1
SIRT2	PNLIP	-0.0695574	0.026994	1
SIRT2	PNLIPRP2	0.067393	0.0321429	1
SIRT2	LPL	0.0629152	0.0455033	1
SIRT2	MOGAT1	0.0674529	0.0319898	1
SIRT2	PLA2G2A	-0.0740391	0.0185485	1
SIRT2	SELENOI	0.0739649	0.0186669	1
SIRT2	UGT8	-0.0745518	0.0177481	1
SIRT2	PAFAH1B3	0.0748883	0.0172393	1
SIRT2	SGMS2	0.0863136	0.00602942	1
SIRT2	PTGS2	0.0720423	0.0219739	1
SIRT2	PTGES	0.0716327	0.022741	1
SIRT2	HPGDS	0.0821886	0.00893641	1
SIRT2	LTA4H	0.0815904	0.00944848	1
SIRT2	GPX1	-0.0845879	0.00712227	1
SIRT2	ALOX12B	0.0675886	0.0316453	1
SIRT2	CYP2C9	-0.0629436	0.0454056	1
SIRT4	HACD4	0.0764258	0.0150738	1
SIRT4	ACAA1	-0.0665055	0.0344855	1
SIRT4	FAR1	0.0701515	0.0257115	1
SIRT4	LBR	0.06355	0.0433635	1
SIRT4	PLB1	-0.0659099	0.0361378	1
SIRT4	GDPD3	-0.0670997	0.0329017	1
SIRT4	TMEM86B	-0.0708791	0.0242128	1
SIRT4	ASAH2	0.0643128	0.0409051	1
SIRT4	SPHK1	0.0647547	0.0395356	1
SIRT4	PTGES2	0.0702973	0.025405	1
SIRT6	HSD17B8	0.0647013	0.039699	1
SIRT6	ACSL6	-0.0616849	0.0499037	1
SIRT6	ACSBG1	-0.0764536	0.0150369	1
SIRT6	PPT2	-0.0720193	0.0220165	1
SIRT6	ELOVL2	0.0705024	0.024979	1
SIRT6	ACOT1	0.074849	0.0172981	1
SIRT6	THEM5	0.0670989	0.0329038	1
SIRT6	ADH1B	-0.0788846	0.012106	1
SIRT6	CYP24A1	-0.0710705	0.0238314	1
SIRT6	CH25H	0.0690777	0.0280694	1
SIRT6	HSD3B2	0.0696187	0.0268591	1
SIRT6	CYP11B2	0.0684601	0.029508	1
SIRT6	UGT2B17	-0.0816743	0.00937509	1
SIRT6	UGT2B28	-0.0673636	0.0322182	1
SIRT6	UGT1A4	0.0795105	0.0114385	1
SIRT6	UGT1A3	0.066767	0.0337807	1
SIRT6	PLPP1	-0.0686033	0.0291688	1
SIRT6	DGKI	-0.0802553	0.0106867	1
SIRT6	DGKB	-0.0747308	0.0174759	1
SIRT6	PNLIPRP3	0.0821416	0.00897568	1
SIRT6	PLA2G2E	0.0783916	0.0126557	1
SIRT6	PLA2G2F	0.0710736	0.0238252	1
SIRT6	ACHE	0.0778603	0.0132729	1
SIRT6	ENPP6	0.0664258	0.0347029	1
SIRT6	GPX5	0.0722913	0.0215189	1
SIRT6	CYP2C19	-0.0788823	0.0121085	1
SIRT6	CYP4F8	-0.0817247	0.00933132	1
SIRT6	ALOX15B	0.0620726	0.0484799	1
AKT1	OLAH	-0.0769147	0.0144372	1
AKT1	ACSBG1	-0.0674551	0.0319843	1
AKT1	ACAA2	0.062014	0.048693	1
AKT1	ELOVL6	-0.0618856	0.0491623	1
AKT1	ELOVL7	0.0801205	0.0108195	1
AKT1	TECR	0.0677139	0.03133	1
AKT1	ACADL	-0.0640753	0.0416575	1
AKT1	ACADSB	0.0676027	0.0316097	1
AKT1	CPT2	0.0617692	0.0495914	1
AKT1	OXCT2	-0.0656906	0.0367632	1
AKT1	BDH1	-0.0786605	0.0123532	1
AKT1	CEL	-0.0637552	0.0426901	1
AKT1	BAAT	-0.0739148	0.0187471	1
AKT1	CYP17A1	-0.0689434	0.0283769	1
AKT1	AKR1C2	-0.0655287	0.0372305	1
AKT1	HSD17B6	-0.0699987	0.0260363	1
AKT1	CYP1A1	-0.0735707	0.0193071	1
AKT1	CYP1A2	-0.0664647	0.0345966	1
AKT1	UGT2A1	-0.070401	0.0251887	1
AKT1	UGT2B15	0.0783318	0.012724	1
AKT1	UGT2B4	0.0724088	0.0213069	1
AKT1	MBOAT1	0.0739031	0.018766	1
AKT1	PLPP2	-0.0724572	0.0212201	1
AKT1	PNPLA3	-0.0698027	0.0264579	1
AKT1	LIPG	-0.0763983	0.0151104	1
AKT1	MGLL	-0.0761715	0.0154146	1
AKT1	MOGAT1	-0.0644124	0.0405928	1
AKT1	PLA2G4F	-0.0686198	0.0291298	1
AKT1	ETNK2	-0.0756539	0.0161291	1
AKT1	CERS5	-0.0664819	0.0345497	1
AKT1	SMPD2	0.0626277	0.046501	1
AKT1	PTGIS	-0.0777943	0.0133514	1
AKT1	SCD5	-0.0690588	0.0281124	1
FOXO4	ACACA	0.062371	0.0474079	1
FOXO4	MECR	-0.0716495	0.022709	1
FOXO4	TECR	0.0847101	0.00703942	1
FOXO4	ACADVL	0.0815187	0.00951155	1
FOXO4	CPT1C	-0.0774141	0.0138115	1
FOXO4	ADH6	0.0684403	0.0295552	1
FOXO4	ALDH7A1	-0.0770117	0.0143138	1
FOXO4	SOAT2	-0.0626889	0.0462871	1
FOXO4	CYP2R1	0.0856764	0.00641399	1
FOXO4	CYP24A1	-0.0714934	0.023007	1
FOXO4	CYP8B1	-0.0671594	0.0327459	1
FOXO4	AKR1D1	-0.0636041	0.0431851	1
FOXO4	SULT2B1	-0.0818459	0.00922665	1
FOXO4	AKR1C2	-0.0794009	0.0115529	1
FOXO4	AKR1C3	0.0628263	0.0458099	1
FOXO4	HSD11B1L	-0.0771791	0.014103	1
FOXO4	UGT1A6	-0.0670236	0.0331009	1
FOXO4	UGT1A1	-0.0730498	0.0201824	1
FOXO4	UGT1A9	-0.0674123	0.0320935	1
FOXO4	COMT	-0.0679214	0.030814	1
FOXO4	AKR1B1	-0.0813579	0.00965447	1
FOXO4	AGPAT1	0.0640978	0.0415859	1
FOXO4	LCLAT1	-0.0692541	0.0276696	1
FOXO4	MBOAT1	0.0831334	0.00817783	1
FOXO4	LPIN3	0.0677431	0.0312571	1
FOXO4	DGKI	-0.0673198	0.0323308	1
FOXO4	DGKH	0.0707128	0.0245485	1
FOXO4	LIPC	0.0792209	0.0117432	1
FOXO4	PLA2G3	-0.0815514	0.00948278	1
FOXO4	PLB1	0.0728818	0.0204721	1
FOXO4	ETNPPL	-0.0712442	0.0234897	1
FOXO4	CDS1	0.0728776	0.0204794	1
FOXO4	CERS5	-0.083276	0.00806847	1
FOXO4	ARSA	-0.0660657	0.0356992	1
FOXO4	NEU2	-0.071791	0.0224418	1
FOXO4	PSAPL1	-0.0790511	0.0119251	1
FOXO4	GPX8	-0.0660482	0.0357482	1
PPARA	PLD3	-0.0626895	0.0462851	1
PPARA	LPCAT4	-0.0699466	0.0261478	1
PPARA	SPHK1	-0.0665494	0.0343662	1
YWHAG	HSD17B8	-0.069083	0.0280571	1
YWHAG	ACSBG1	0.0678374	0.031022	1
YWHAG	PPT2	0.0671113	0.0328712	1
YWHAG	TECR	0.068548	0.0292993	1
YWHAG	ACADL	0.0719822	0.0220851	1
YWHAG	ACADVL	-0.0820595	0.00904476	1
YWHAG	CPT1C	-0.0836627	0.00777855	1
YWHAG	ADH6	0.0658293	0.0363667	1
YWHAG	HMGCLL1	-0.0815464	0.00948718	1
YWHAG	TM7SF2	-0.0779439	0.0131741	1
YWHAG	ACOX2	-0.0693721	0.0274051	1
YWHAG	SRD5A2	-0.0625878	0.0466411	1
YWHAG	CYP11B1	-0.0667665	0.0337819	1
YWHAG	CYP11B2	-0.0619566	0.0489026	1
YWHAG	HSD11B1L	-0.0751033	0.0169209	1
YWHAG	AKR1C1	0.0683762	0.0297082	1
YWHAG	HSD17B1	0.072428	0.0212725	1
YWHAG	DHRS11	-0.0731838	0.019954	1
YWHAG	CYP3A5	-0.0803313	0.0106126	1
YWHAG	UGT1A6	-0.0631664	0.044646	1
YWHAG	UGT1A4	-0.0663329	0.0349576	1
YWHAG	UGT1A3	-0.0627149	0.0461965	1
YWHAG	UGT2B10	-0.0726164	0.0209368	1
YWHAG	UGT2B7	-0.0667751	0.0337589	1
YWHAG	UGT1A8	-0.0778081	0.0133349	1
YWHAG	UGT1A5	-0.0824535	0.00871764	1
YWHAG	GLYCTK	0.0831195	0.0081886	1
YWHAG	DGKI	-0.0817935	0.00927178	1
YWHAG	MOGAT2	-0.0634978	0.0435361	1
YWHAG	PLA2G2A	-0.0709087	0.0241536	1
YWHAG	GAL3ST1	-0.0811375	0.00985339	1
YWHAG	CERS1	-0.0699132	0.0262195	1
YWHAG	NEU2	-0.0673252	0.0323169	1
YWHAG	PSAPL1	-0.0796567	0.0112873	1
YWHAG	GPX6	-0.0665003	0.0344997	1
YWHAG	SCD5	0.0798827	0.0110571	1
p=0 if the p values were less than 1x10-16
